# Supplementary material for: High-performance fiber-shaped Li-ion battery enabled by a surface-reinforced self-supporting electrode
Source: Royal Society of Chemistry journal article supplement (doi:10.1039/d3cc00976a), 2023-01-01
Supplement: d3cc00976a1.pdf [file d3cc00976a1.pdf]

## Supporting Information

### High-performance Fiber-shaped Li-ion Battery Enabled by Surface-reinforced Self-supporting Electrode

Cong Liu,<sup>a†</sup> Yining Lao,<sup>a†</sup> Fan Yang,<sup>a</sup> Xiaoqi Gong,<sup>a</sup> Xiaotong Wang,<sup>a</sup> Jiang Lu,<sup>\*a</sup> Zhiping Zeng<sup>†b</sup> and Dingshan Yu<sup>\*a</sup>

- a. Key Laboratory for Polymeric Composite and Functional Materials of Ministry of Education, Key Laboratory of High-Performance Polymer-based Composites of Guangdong Province, School of Chemistry, Sun Yat-sen University, Guangzhou 510006, China.
- b. State Key Laboratory of Optoelectronic Materials and Technologies, Guangzhou Key Laboratory of Flexible Electronic Materials and Wearable Devices, Nanotechnology Research Center, School of Materials Science and Engineering, Sun Yat-sen University, Guangzhou, 510275 P. R. China. Email: [zzhip8@mail.sysu.edu.cn](mailto:zzhip8@mail.sysu.edu.cn).

\* Corresponding author

Email addresses: [gaofenzi@mail.sysu.edu.cn](mailto:gaofenzi@mail.sysu.edu.cn) (Jiang Lu), [zzhip8@mail.sysu.edu.cn](mailto:zzhip8@mail.sysu.edu.cn) (Zhiping Zeng), [yudings@mail.sysu.edu.cn](mailto:yudings@mail.sysu.edu.cn) (Dingshan Yu)

† These authors contributed equally to this work.

## **Experimental section**

### **Preparation of fiber electrodes**

In typical, sodium alginate binder was dissolved in 10 mL distilled water to form an aqueous solution. Then 8g active material (LTO or LFP material) and 1g Super P carbon were added to the above solution. Subsequently, the mixture was diluted to 20 mL, followed by vigorously stirring for 2 h. The solution was placed into a 2.5 mL syringe and squeezed into the coagulation solution containing chitosan and acetic acid at a proper extrusion pressure to obtain the fiber-shaped electrode after a through solvent exchange. The fiber was placed in the coagulation solution for 1 h, then naturally-dried at room temperature. The obtained fiber electrodes were used for the subsequent characterization.

### **Materials Characterizations**

Powder X-ray diffraction (PXRD, D/MAX 2200 VPC) with Cu K $\alpha$  radiation ( $\lambda = 0.154$  nm) were executed to investigate the crystalline phases. FESEM (ZEISS Ultra-55) was applied to examine the microstructure properties. The rheological tests were carried out using the AR 2000 rotary rheometer (TA Instruments, USA) at 25 °C.

### **Electrochemical tests**

The separator-wrapped-cathode and anode fiber electrodes are twisted together and packaged into a heat-shrinkable tube (diameter:  $\sim 2.0$  mm), and then electrolyte (1M LiPF<sub>6</sub> in EC: DEC: DMC=1:1:1) was injected into the tube in an Ar-filled glove box. Once the cell was well packaged, it was taken out of the glove box for battery tests under ambient lab conditions. The assembled batteries were galvanostatic discharged/charged in the voltage window of 1.0-2.5 V. Cyclic voltammograms (CV) and electrochemical impedance spectroscopy (EIS) were performed on electrochemical workstation (CHI660E). Considering the theoretical capacity of LFP and LTO electrode ( $\sim 170$  mAh g<sup>-1</sup> Vs.  $\sim 175$  mAh g<sup>-1</sup>), the N/P ratio ( $\sim 1.1$ ) was set to achieve a capacity balance.

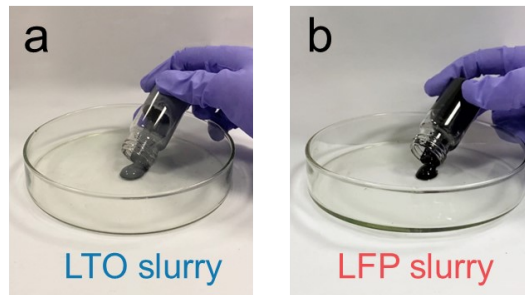

**Fig. S1** Photographs of the prepared electrode slurries for fiber batteries.

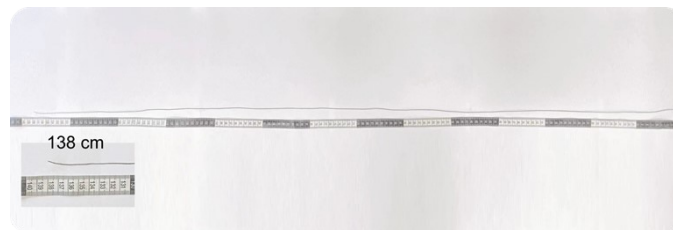

**Fig. S2** Photographs of fiber-shape electrode with a length of about 138 cm.

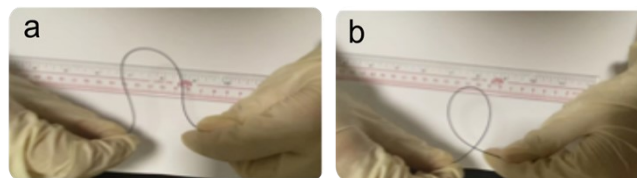

**Fig. S3** Photographs of fiber-shape electrode under folding deformation.

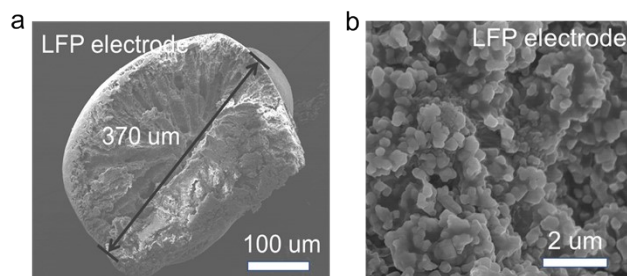

**Fig. S4** (a) Cross-sectional and (b) SEM image of LFP fiber electrode.

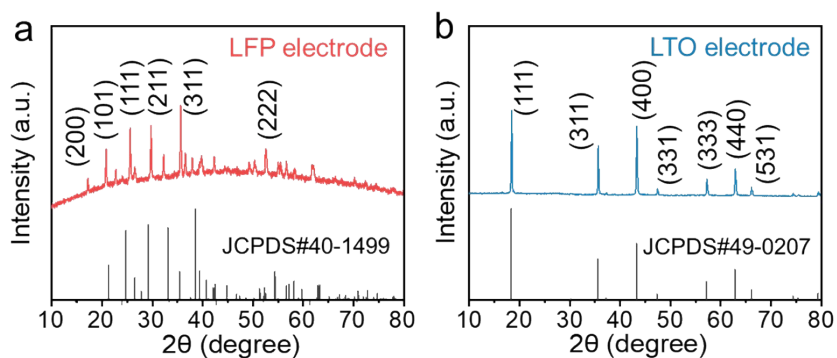

**Fig. S5** XRD patterns of (a) LFP electrode and (b) LTO electrode.

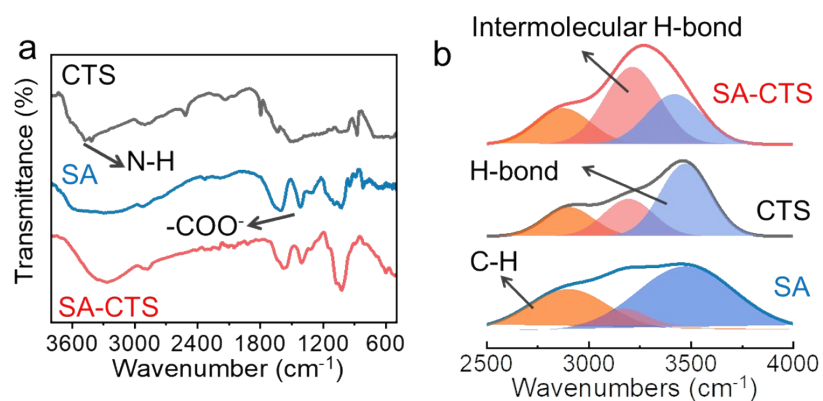

**Fig. S6** FT-IR spectra of SA, CTS and SA-CTS.

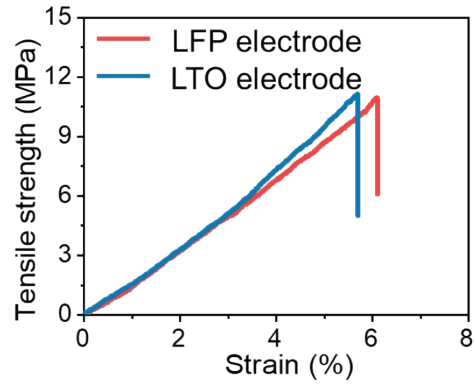

**Fig. S7** Typical curves of tensile strength testing for LFP and LTO fiber electrodes.

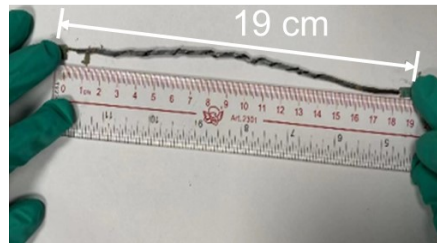

**Fig. S8** The photo of as-fabricated fiber-shape full battery.

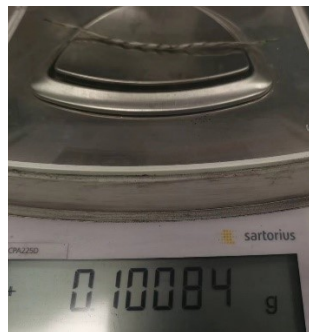

**Fig. S9** The overall mass of the fiber-shape full battery.

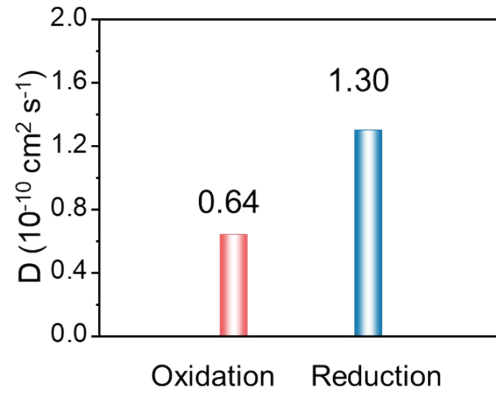

**Fig. S10** Diffusion coefficient derived from CV response for fiber LFP//LTO battery.

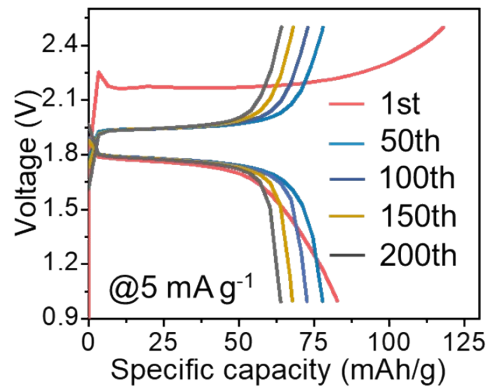

**Fig. S11** Selected GCD profiles at  $5 \text{ mA g}^{-1}$  during long-term cycling.

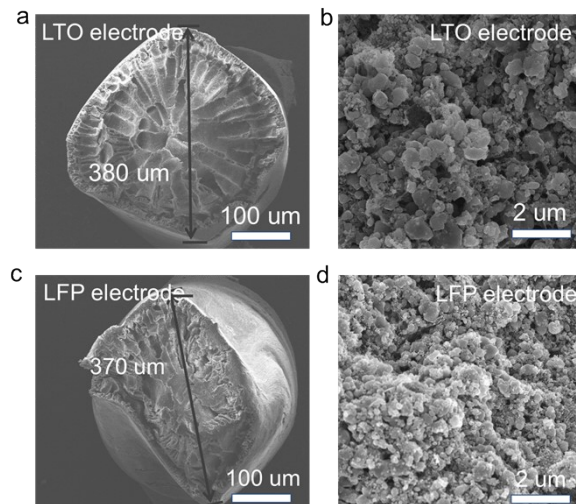

**Fig. S12** Cross-sectional and high magnification SEM images of (a, b) LTO and (c, d) fiber electrode after cycling.

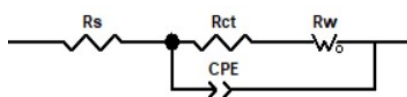

**Fig. S13** The equivalent circuit of EIS results.

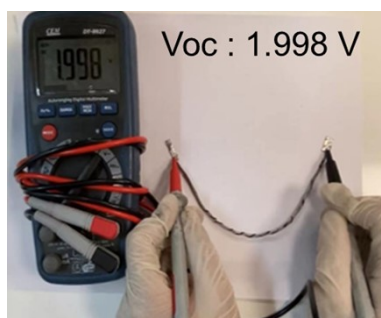

**Fig. S14** The open-circuit voltage (Voc) of this fiber device.

**Tab. S1** The comparison of linear capacity and gravimetric energy density of fiber-shaped full cells.

| Cathode/Anode                                                                                   | Linear capacity<br>(mAh cm <sup>-1</sup> ) | Gravimetric energy<br>density (Wh kg <sup>-1</sup> ) | Ref.                                           |
|-------------------------------------------------------------------------------------------------|--------------------------------------------|------------------------------------------------------|------------------------------------------------|
| LiFePO <sub>4</sub><br>Li <sub>4</sub> Ti <sub>5</sub> O <sub>12</sub>                          | 0.144                                      | 50.6                                                 | <b>This work</b>                               |
| LiFePO <sub>4</sub><br>Li <sub>4</sub> Ti <sub>5</sub> O <sub>12</sub>                          | 0.14                                       | ---                                                  | Adv. Mater., 2023, 15,<br>2211201              |
| LiFePO <sub>4</sub><br>Li <sub>4</sub> Ti <sub>5</sub> O <sub>12</sub>                          | 0.092                                      | ---                                                  | Adv. Funct. Mater.,<br>2017, 27, 1703140       |
| LiMn <sub>2</sub> O <sub>4</sub> -CNT<br>LiTi <sub>2</sub> (PO <sub>4</sub> ) <sub>3</sub> -CNT | 0.05                                       | ---                                                  | Nat. Nanotechnol.,<br>2022, 17, 372-377        |
| LiMn <sub>2</sub> O <sub>4</sub><br>TiO <sub>2</sub> /rGO                                       | 0.028                                      | ---                                                  | Nano Lett. , 2017, 17,<br>3432-3549            |
| LiMn <sub>2</sub> O <sub>4</sub> -CNT<br>Li <sub>4</sub> Ti <sub>5</sub> O <sub>12</sub> -CNT   | 0.0036                                     | 30                                                   | J. Mater. Chem. A,<br>2014, 2, 11054-11059     |
| LiMn <sub>2</sub> O <sub>4</sub> -CNT<br>Li <sub>4</sub> Ti <sub>5</sub> O <sub>12</sub> -CNT   | 0.0028                                     | 27                                                   | Angew. Chem. Int. Ed.,<br>2014, 126, 7998-8003 |
| LiMn <sub>2</sub> O <sub>4</sub> -CNT<br>Polyimide-CNT                                          | 0.0012                                     | 48.93                                                | J. Mater. Chem. A,<br>2016, 4, 9002-9008       |

**Tab. S2** The resistances of the fiber-shaped full cell before and after 200 cycles.

| Fiber-shaped LFP//LTO full cell | Internal resistance (Rs, $\Omega$ ) | Charge transfer resistance (Rct, $\Omega$ ) | Warburg resistance (Rs, $\Omega$ ) |
|---------------------------------|-------------------------------------|---------------------------------------------|------------------------------------|
| Before cycles                   | 8.53                                | 57.35                                       | 82.76                              |
| After cycles                    | 9.25                                | 83.93                                       | 95.86                              |
